# Supplementary material
Source: PubMed Central journal article supplement (PMC6767361)
Supplement: jp9b06858_si_001.pdf [file jp9b06858_si_001.pdf]

## Supplementary Information

# Proto-Isomerization of Indigo and Isoindigo Dyes Confirmed by Gas-Phase Infrared Ion Spectroscopy

Musleh Uddin Munshi<sup>a</sup>, Jonathan Martens<sup>a</sup>, Giel Berden<sup>a</sup>, Jos Oomens<sup>a,b\*</sup>

<sup>a</sup>Radboud University, Institute for Molecules and Materials, FELIX Laboratory, Toernooiveld 7, 6525 ED Nijmegen, The Netherlands

<sup>b</sup>University of Amsterdam, Science Park 904, 1098XH Amsterdam, The Netherlands

\*Corresponding author: [joso@science.ru.nl](mailto:joso@science.ru.nl)

## Supplementary Figures

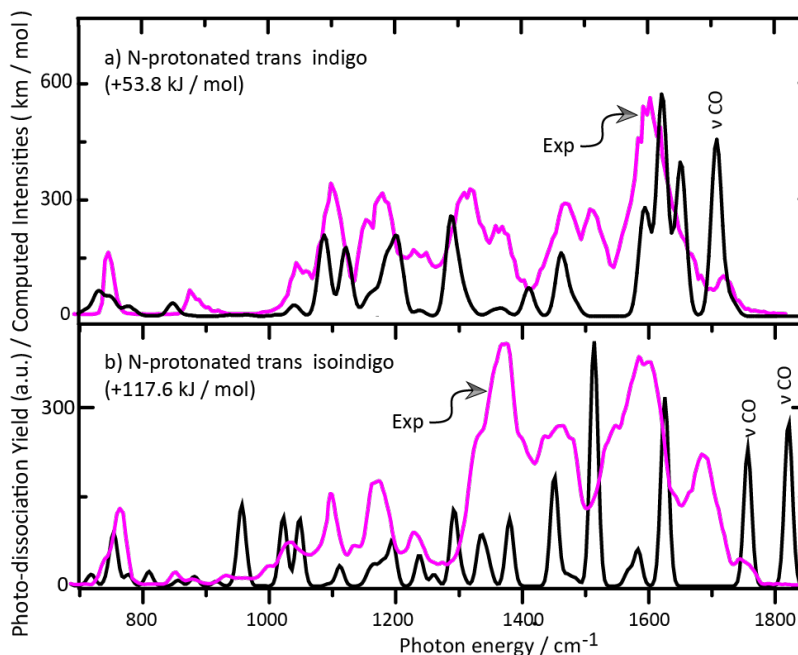

**Figure S1:** Gas-phase IRMPD spectra of protonated indigo (a) and protonated isoindigo (b) compared with computed spectra for N-protonated species in their *trans* configurations.

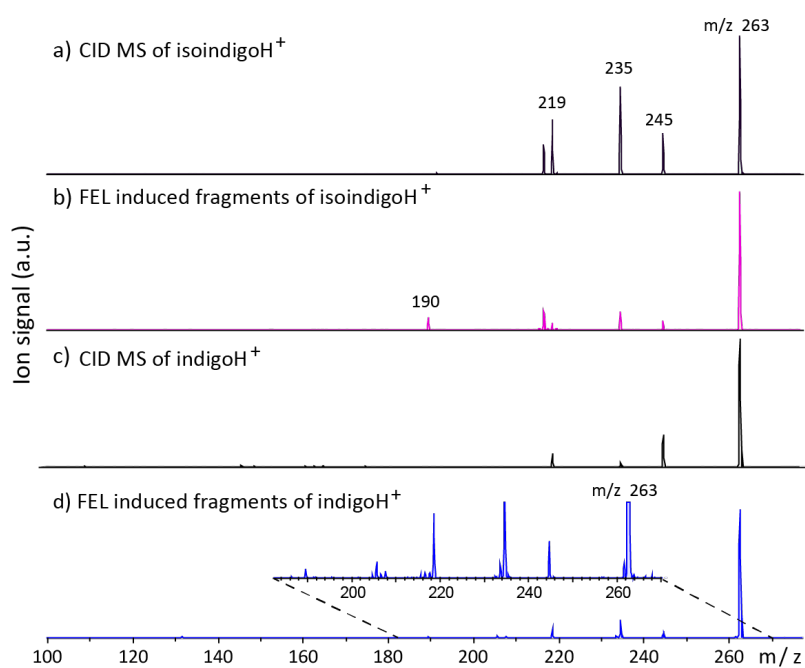

**Figure S2** Mass spectra: CID MS (a) and on-resonance FEL induced photo-fragments at fixed IR laser frequency (b) of the protonated isoindigo ( $m/z$  263). Similarly, CID MS (c) and FEL induced photo-fragments at fixed IR laser frequency (d) of the protonated indigo ( $m/z$  263) which are very similar to the CID mass-fragments reported in the past[1,2].

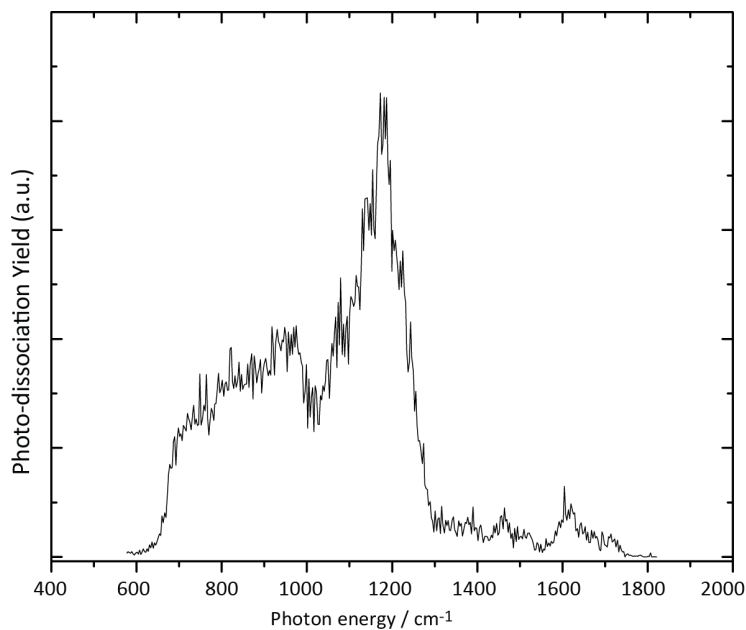

**Figure S3** IRMPD spectrum of the mass isolated  $m/z$  263 background ion. See main text for detailed discussion.

### Cartesian coordinates of optimized structures at B3LYP/6-31++G(d,p)

#### Neutral indigo (trans)

| Atom | X            | Y            | Z            |
|------|--------------|--------------|--------------|
| 6    | -2.921431000 | -0.674574000 | 0.000000000  |
| 6    | -2.825724000 | 0.737738000  | -0.000030000 |
| 6    | -3.970762000 | 1.536533000  | 0.000016000  |
| 6    | -5.208731000 | 0.888273000  | 0.000096000  |
| 6    | -5.316760000 | -0.514993000 | 0.000117000  |
| 6    | -4.168018000 | -1.305440000 | 0.000065000  |
| 6    | -1.554706000 | -1.209474000 | -0.000048000 |
| 6    | -0.681307000 | 0.000551000  | -0.000105000 |
| 1    | -3.905724000 | 2.620130000  | -0.000012000 |
| 1    | -6.113836000 | 1.488963000  | 0.000137000  |
| 1    | -6.298139000 | -0.977952000 | 0.000175000  |
| 1    | -4.225711000 | -2.389674000 | 0.000083000  |
| 6    | 0.681307000  | -0.000554000 | -0.000084000 |
| 6    | 1.554705000  | 1.209472000  | -0.000033000 |
| 6    | 2.825725000  | -0.737738000 | -0.000010000 |
| 6    | 2.921430000  | 0.674574000  | 0.000008000  |
| 6    | 3.970765000  | -1.536531000 | 0.000022000  |
| 6    | 4.168016000  | 1.305443000  | 0.000059000  |
| 6    | 5.208732000  | -0.888269000 | 0.000070000  |

|   |              |              |              |
|---|--------------|--------------|--------------|
| 1 | 3.905728000  | -2.620128000 | 0.000013000  |
| 6 | 5.316759000  | 0.514998000  | 0.000089000  |
| 1 | 4.225707000  | 2.389677000  | 0.000071000  |
| 1 | 6.113839000  | -1.488957000 | 0.000097000  |
| 1 | 6.298137000  | 0.977958000  | 0.000128000  |
| 7 | -1.489421000 | 1.119883000  | -0.000157000 |
| 1 | -1.111326000 | 2.058805000  | -0.000012000 |
| 7 | 1.489423000  | -1.119885000 | -0.000050000 |
| 1 | 1.111331000  | -2.058808000 | -0.000043000 |
| 8 | 1.144247000  | 2.374852000  | -0.000013000 |
| 8 | -1.144249000 | -2.374859000 | -0.000058000 |

**protonated indigo - cis**

| Atom | X            | Y            | Z            |
|------|--------------|--------------|--------------|
| 6    | 2.946190000  | 0.486684000  | -0.031591000 |
| 6    | 2.855565000  | -0.917026000 | 0.023589000  |
| 6    | 3.982290000  | -1.722871000 | 0.063569000  |
| 6    | 5.225681000  | -1.071280000 | 0.043581000  |
| 6    | 5.335881000  | 0.328001000  | -0.014948000 |
| 6    | 4.192833000  | 1.125089000  | -0.052302000 |
| 6    | 1.598734000  | 1.015819000  | -0.041890000 |
| 6    | 0.685490000  | -0.195536000 | -0.002955000 |
| 1    | 3.919854000  | -2.805312000 | 0.106313000  |
| 1    | 6.129113000  | -1.672278000 | 0.073312000  |
| 1    | 6.318146000  | 0.787007000  | -0.029989000 |
| 1    | 4.254679000  | 2.207523000  | -0.094335000 |
| 6    | -0.692478000 | -0.189509000 | -0.020324000 |
| 6    | -1.590424000 | 0.966800000  | 0.022390000  |
| 6    | -2.838730000 | -0.944864000 | -0.019236000 |
| 6    | -2.919506000 | 0.470329000  | 0.033345000  |
| 6    | -3.985275000 | -1.734726000 | -0.060566000 |
| 6    | -4.170276000 | 1.124168000  | 0.066863000  |
| 6    | -5.212020000 | -1.069225000 | -0.035564000 |
| 1    | -3.936144000 | -2.817673000 | -0.103152000 |
| 6    | -5.310535000 | 0.340551000  | 0.031428000  |
| 1    | -4.222460000 | 2.206544000  | 0.114189000  |
| 1    | -6.124287000 | -1.657076000 | -0.064676000 |
| 1    | -6.290626000 | 0.803793000  | 0.053653000  |
| 7    | 1.494859000  | -1.292988000 | 0.024086000  |
| 1    | 1.186990000  | -2.240386000 | 0.190107000  |
| 7    | -1.500309000 | -1.326654000 | -0.006658000 |
| 1    | -1.198109000 | -2.233408000 | -0.332295000 |
| 8    | 1.222930000  | 2.196510000  | -0.066110000 |
| 8    | -1.269072000 | 2.220088000  | 0.056952000  |
| 1    | -0.250382000 | 2.351558000  | 0.005797000  |

**protonated indigo - trans**

| Atom | X            | Y            | Z            |
|------|--------------|--------------|--------------|
| 6    | -2.938186000 | -0.691001000 | 0.000001000  |
| 6    | -2.869878000 | 0.713234000  | -0.000005000 |
| 6    | -4.003038000 | 1.507213000  | -0.000007000 |
| 6    | -5.241741000 | 0.840732000  | -0.000005000 |
| 6    | -5.330407000 | -0.557282000 | 0.000001000  |
| 6    | -4.172135000 | -1.342273000 | 0.000005000  |
| 6    | -1.566108000 | -1.202587000 | 0.000008000  |
| 6    | -0.686442000 | 0.055287000  | -0.000003000 |
| 1    | -3.951624000 | 2.591102000  | -0.000010000 |
| 1    | -6.152295000 | 1.431373000  | -0.000007000 |
| 1    | -6.305241000 | -1.032406000 | 0.000003000  |
| 1    | -4.221748000 | -2.426296000 | 0.000009000  |
| 6    | 0.696138000  | 0.044676000  | -0.000004000 |
| 6    | 1.599582000  | 1.149585000  | 0.000000000  |
| 6    | 2.787713000  | -0.781748000 | -0.000015000 |
| 6    | 2.912634000  | 0.649761000  | 0.000006000  |
| 6    | 3.922700000  | -1.606965000 | -0.000019000 |
| 6    | 4.198127000  | 1.253671000  | 0.000019000  |
| 6    | 5.160351000  | -0.984735000 | -0.000005000 |
| 1    | 3.833909000  | -2.688016000 | -0.000029000 |
| 6    | 5.303242000  | 0.432739000  | 0.000012000  |
| 1    | 4.314085000  | 2.333632000  | 0.000028000  |
| 1    | 6.056240000  | -1.597626000 | -0.000008000 |
| 1    | 6.298936000  | 0.862169000  | 0.000019000  |
| 7    | -1.507641000 | 1.117412000  | -0.000004000 |
| 1    | -1.189897000 | 2.079508000  | -0.000014000 |
| 7    | 1.464460000  | -1.117708000 | -0.000026000 |
| 1    | 1.055242000  | -2.044895000 | 0.000026000  |
| 8    | -1.120009000 | -2.338119000 | 0.000029000  |
| 8    | 1.130666000  | 2.406751000  | 0.000003000  |
| 1    | 1.844099000  | 3.062642000  | 0.000008000  |

**Neutral isoindigo (trans)**

| Atom | X            | Y            | Z            |
|------|--------------|--------------|--------------|
| 6    | -2.865742000 | -0.952290000 | -0.000404000 |
| 6    | -2.005941000 | 0.178634000  | 0.000013000  |
| 6    | -2.618629000 | 1.444272000  | 0.000897000  |
| 6    | -4.014282000 | 1.547017000  | 0.001317000  |
| 6    | -4.824965000 | 0.409611000  | 0.000864000  |
| 6    | -4.250332000 | -0.866566000 | -0.000002000 |
| 6    | -0.752653000 | -1.843949000 | -0.001396000 |
| 6    | -0.611235000 | -0.320946000 | -0.000479000 |
| 1    | -2.010750000 | 2.333707000  | 0.001210000  |
| 1    | -4.467654000 | 2.533261000  | 0.001988000  |
| 1    | -5.906373000 | 0.509989000  | 0.001185000  |
| 1    | -4.864757000 | -1.761848000 | -0.000345000 |
| 6    | 0.611230000  | 0.321024000  | -0.000292000 |

|   |              |              |              |
|---|--------------|--------------|--------------|
| 6 | 2.005915000  | -0.178616000 | 0.000316000  |
| 6 | 0.752706000  | 1.844006000  | -0.000801000 |
| 6 | 2.865750000  | 0.952277000  | 0.000318000  |
| 6 | 2.618548000  | -1.444276000 | 0.000998000  |
| 6 | 4.250338000  | 0.866511000  | 0.000930000  |
| 6 | 4.014200000  | -1.547068000 | 0.001629000  |
| 1 | 2.010636000  | -2.333689000 | 0.000994000  |
| 6 | 4.824922000  | -0.409692000 | 0.001584000  |
| 1 | 4.864809000  | 1.761761000  | 0.000907000  |
| 1 | 4.467541000  | -2.533327000 | 0.002138000  |
| 1 | 5.906326000  | -0.510109000 | 0.002061000  |
| 8 | 0.097077000  | -2.724745000 | -0.002215000 |
| 8 | -0.096983000 | 2.724798000  | -0.001535000 |
| 7 | -2.100852000 | -2.111909000 | -0.001206000 |
| 1 | -2.449705000 | -3.058904000 | -0.001761000 |
| 7 | 2.100902000  | 2.111929000  | -0.000328000 |
| 1 | 2.449849000  | 3.058889000  | -0.000588000 |

**protonated isoindigo - cis**

| Atom | X            | Y            | Z            |
|------|--------------|--------------|--------------|
| 6    | 2.949690000  | 0.088929000  | -0.169332000 |
| 6    | 1.669484000  | -0.466927000 | 0.076843000  |
| 6    | 1.595856000  | -1.819368000 | 0.452319000  |
| 6    | 2.764165000  | -2.580157000 | 0.502341000  |
| 6    | 4.005001000  | -2.010659000 | 0.189335000  |
| 6    | 4.116939000  | -0.651322000 | -0.138867000 |
| 6    | 1.530174000  | 1.864495000  | -0.214714000 |
| 6    | 0.695487000  | 0.612776000  | -0.008272000 |
| 1    | 0.656024000  | -2.269941000 | 0.739857000  |
| 1    | 2.710473000  | -3.623311000 | 0.794097000  |
| 1    | 4.900698000  | -2.622407000 | 0.222214000  |
| 1    | 5.083040000  | -0.201214000 | -0.341544000 |
| 6    | -0.685435000 | 0.615204000  | 0.000940000  |
| 6    | -1.666692000 | -0.471684000 | -0.078976000 |
| 6    | -1.516820000 | 1.842764000  | 0.206473000  |
| 6    | -2.942886000 | 0.083659000  | 0.165126000  |
| 6    | -1.599312000 | -1.822681000 | -0.450049000 |
| 6    | -4.116842000 | -0.645432000 | 0.136804000  |
| 6    | -2.773934000 | -2.578730000 | -0.495421000 |
| 1    | -0.662922000 | -2.280967000 | -0.736587000 |
| 6    | -4.012611000 | -2.006835000 | -0.185514000 |
| 1    | -5.079846000 | -0.187066000 | 0.336230000  |
| 1    | -2.722630000 | -3.623395000 | -0.782646000 |
| 1    | -4.910514000 | -2.615045000 | -0.216563000 |
| 8    | 1.162552000  | 3.057019000  | -0.264275000 |
| 8    | -1.173961000 | 3.069501000  | 0.278932000  |
| 1    | -0.119687000 | 3.184357000  | 0.040366000  |
| 7    | 2.809689000  | 1.473333000  | -0.375151000 |

|   |              |             |              |
|---|--------------|-------------|--------------|
| 1 | 3.563666000  | 2.134111000 | -0.516399000 |
| 7 | -2.790232000 | 1.473536000 | 0.359857000  |
| 1 | -3.536799000 | 2.140443000 | 0.516577000  |

**protonated isoindigo - trans**

| Atom | X            | Y            | Z            |
|------|--------------|--------------|--------------|
| 6    | -2.857287000 | -0.948610000 | -0.133662000 |
| 6    | -1.976280000 | 0.152448000  | 0.104410000  |
| 6    | -2.538424000 | 1.375636000  | 0.541945000  |
| 6    | -3.914084000 | 1.487696000  | 0.675304000  |
| 6    | -4.753926000 | 0.395426000  | 0.384543000  |
| 6    | -4.235745000 | -0.840050000 | -0.013225000 |
| 6    | -0.762297000 | -1.827514000 | -0.364751000 |
| 6    | -0.630284000 | -0.322046000 | -0.055734000 |
| 1    | -1.907091000 | 2.217265000  | 0.787196000  |
| 1    | -4.348905000 | 2.422061000  | 1.012565000  |
| 1    | -5.828763000 | 0.507875000  | 0.487757000  |
| 1    | -4.887750000 | -1.684959000 | -0.207410000 |
| 6    | 0.607926000  | 0.318574000  | -0.057870000 |
| 6    | 1.982764000  | -0.200031000 | 0.099086000  |
| 6    | 0.793105000  | 1.729056000  | -0.336441000 |
| 6    | 2.866270000  | 0.884451000  | -0.082167000 |
| 6    | 2.541775000  | -1.436092000 | 0.456471000  |
| 6    | 4.243205000  | 0.807844000  | 0.043065000  |
| 6    | 3.930412000  | -1.539753000 | 0.589725000  |
| 1    | 1.918585000  | -2.304930000 | 0.604280000  |
| 6    | 4.773819000  | -0.443312000 | 0.379529000  |
| 1    | 4.882402000  | 1.672699000  | -0.103568000 |
| 1    | 4.360263000  | -2.499536000 | 0.856026000  |
| 1    | 5.847642000  | -0.556873000 | 0.483465000  |
| 8    | 0.116320000  | -2.641186000 | -0.558744000 |
| 8    | -0.170072000 | 2.589661000  | -0.622265000 |
| 1    | 0.154569000  | 3.442626000  | -0.952796000 |
| 7    | -2.116493000 | -2.076435000 | -0.447813000 |
| 1    | -2.482119000 | -3.003438000 | -0.618425000 |
| 7    | 2.090489000  | 2.032550000  | -0.366898000 |
| 1    | 2.477538000  | 2.944262000  | -0.579425000 |

## SI References

1. Zou, P. and H.L. Koh, *Determination of indican, isatin, indirubin and indigotin in Isatis indigotica by liquid chromatography/electrospray ionization tandem mass spectrometry*. Rapid communications in mass spectrometry, 2007. **21**(7): p. 1239-1246.

2. Puchalska, M., et al., *Identification of indigoid dyes in natural organic pigments used in historical art objects by high-performance liquid chromatography coupled to electrospray ionization mass spectrometry*. *Journal of mass spectrometry*, 2004. **39**(12): p. 1441-1449.
